# Supplementary material for: Chronic Exposure of Corals to Fine Sediments: Lethal and Sub-Lethal Impacts
Source: PLoS One. 2012 May 25;7(5):e37795. doi: 10.1371/journal.pone.0037795 (PMC3360596; doi:10.1371/journal.pone.0037795)
Supplement: Table S5 — Analyses performed on the sediment samples used in the present experiments. (DOCX) [file pone.0037795.s009.docx]

Table S5. Analyses performed on the sediment samples used in the present experiments.

| **Analyte** | **Analysis type** | **Provider** |
| --- | --- | --- |
| Total Nitrogen | Kjel | QHFSS1 |
| Total Phosphorus | ICPAES3 | QHFSS1 |
| Total Carbon | ICPAES3 | QHFSS1 |
| Total Organic Carbon | ICPAES3 | QHFSS1 |
| Elemental analysis (incuding metals) | ICPAES3 | QHFSS1 |
| Polycyclic aromatic hydrocarbons (PAH) | GC-MS4 | QHFSS1 |
| Polychlorinated biphenyls (PCB) | GC-MS4 | QHFSS1 |
| Total petroleum hydrocarbons (TPH) | GC-MS4 | QHFSS1 |
| Tributyltin (TBT) | GC-QFAAS5 | ALS2 |

1QHFSS = Queensland Health Forensic and Scientific Services (Archerfield, QLD)

2ALS = Laboratory Services Environmental Division (Brisbane, QLD)

3ICPAES = inductively coupled plasma-atomic emission spectrometry

4GC-MS = gas chromatography – mass spectrometry

5GC-QFAAS = gas chromatography––quartz furnace atomic absorption spectrometry
